# Supplementary material for: Intestinal Insulin Signaling Encodes Two Different Molecular Mechanisms for the Shortened Longevity Induced by Graphene Oxide in Caenorhabditis elegans
Source: PubMed Central journal article supplement (PMC4819199; doi:10.1038/srep24024), 2016-04-04
Supplement: srep24024-s1.pdf [file srep24024-s1.pdf]

**Intestinal Insulin Signaling Encoded Two Different Molecular Mechanisms for the Shortened Longevity Induced by Graphene Oxide in *Caenorhabditis elegans***

Yunli Zhao,<sup>a, b</sup> Ruilong Yang,<sup>a, c</sup> Qi Rui<sup>c</sup> & Dayong Wang<sup>\*a</sup>

<sup>a</sup>Key Laboratory of Environmental Medicine Engineering in Ministry of Education, Medical School, Southeast University, Nanjing 210009, China

<sup>b</sup>Department of Preventive Medicine, Bengbu Medical College, Bengbu 233020, China

<sup>c</sup>College of Life Sciences, Nanjing Agricultural University, Nanjing 210095, China

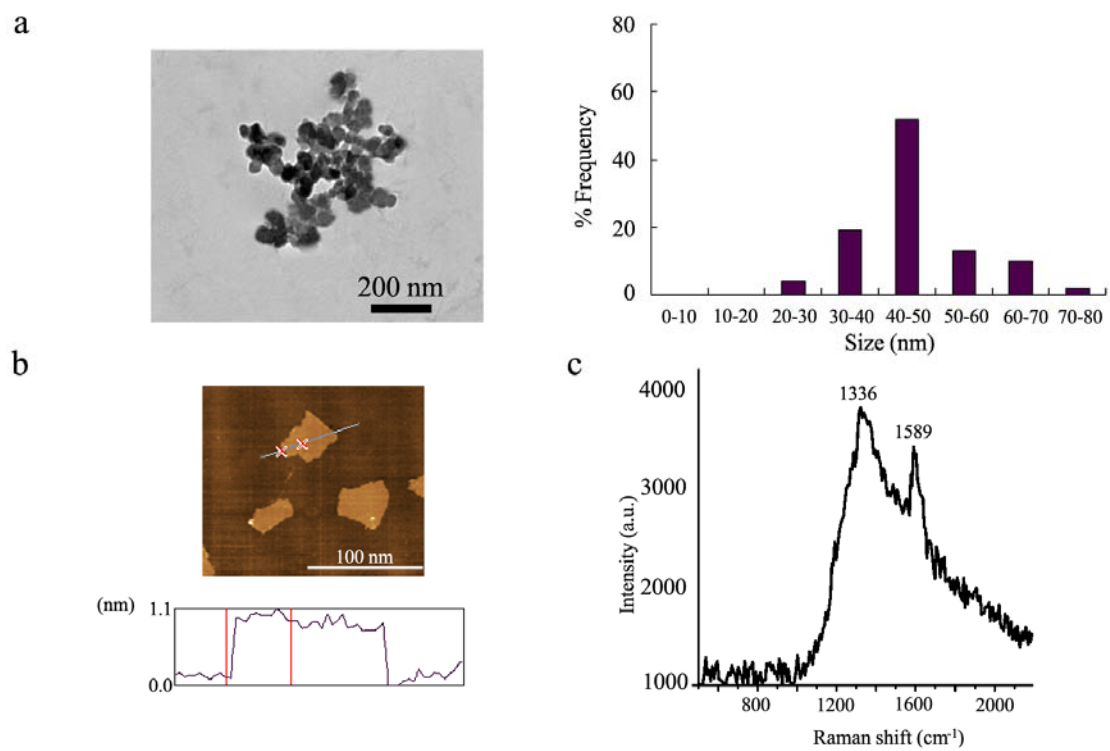

**Figure S1 | Physiochemical properties of GO.** (a) TEM of GO in K-medium. (b) AFM analysis of GO. (c) Raman spectrum of GO.

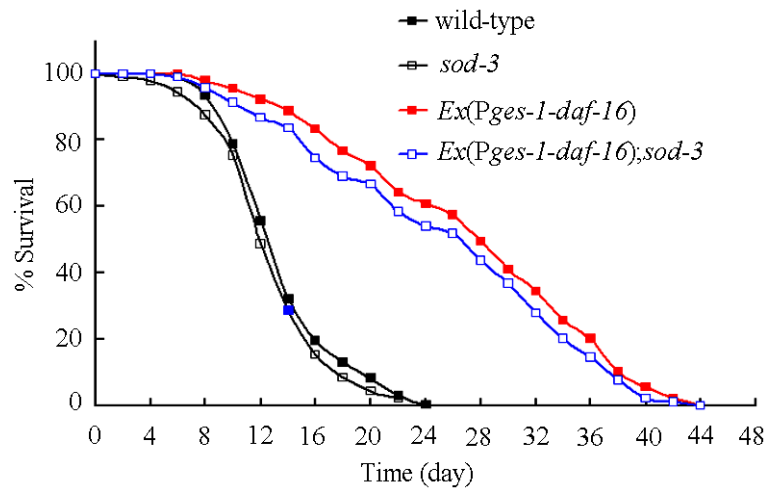

**Figure S2** | Effects of *sod-3* mutation on lifespan in nematodes overexpressing *daf-16* gene in intestine in nematodes. Nematodes were not exposed to GO.

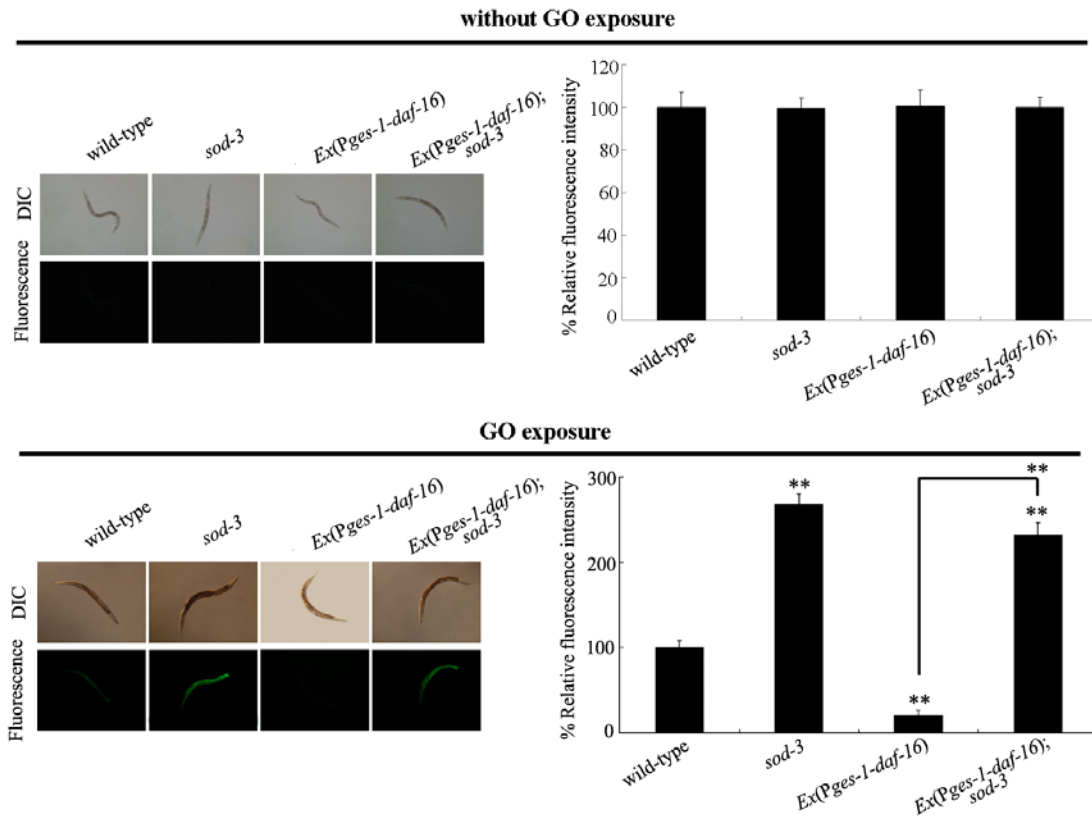

**Figure S3 | Mutation of *sod-3* gene induced the induction of ROS production in GO-exposed nematodes overexpressing *daf-16* gene in intestine.** GO exposure concentration was 100 mg L<sup>-1</sup>. Prolonged exposure was performed from L1-larvae to young adults. Bars represent means ± SEM. \*\**P* < 0.01 vs. wild-type (if not specially indicated).

**Table S1 | Lifespan in *daf-16* or *daf-2* mutants exposed to GO**

| Treatment                                       | Mean lifespan (day) | Significance (compared with N2) |
|-------------------------------------------------|---------------------|---------------------------------|
| Wild-type (control)                             | 15.1 ± 0.6          |                                 |
| Wild-type (100 mg L <sup>-1</sup> GO)           | 13.2 ± 0.4          |                                 |
| <i>daf-16(mu86)</i> (control)                   | 10.8 ± 0.4          | <i>P</i> < 0.01                 |
| <i>daf-16(mu86)</i> (100 mg L <sup>-1</sup> GO) | 6.5 ± 0.6           | <i>P</i> < 0.01                 |
| Wild-type (control)                             | 15.2 ± 0.6          |                                 |
| Wild-type (100 mg L <sup>-1</sup> GO)           | 12.7 ± 0.8          |                                 |
| <i>daf-2(e1370)</i> (control)                   | 23.9 ± 0.7          | <i>P</i> < 0.01                 |
| <i>daf-2(e1370)</i> (100 mg L <sup>-1</sup> GO) | 22.6 ± 0.5          | <i>P</i> < 0.01                 |

**Table S2 | Mutations of *age-1*, *akt-1*, *akt-2*, or *daf-18* gene affected the GO toxicity on lifespan in nematodes**

| Treatment                                        | Mean lifespan (day) | Significance (compared with control) |
|--------------------------------------------------|---------------------|--------------------------------------|
| Wild-type (control)                              | 15.4 ± 0.6          |                                      |
| Wild-type (100 mg L <sup>-1</sup> GO)            | 12.5 ± 0.8          |                                      |
| <i>age-1(hx546)</i> (control)                    | 23.4 ± 0.5          | <i>P</i> < 0.01                      |
| <i>age-1(hx546)</i> (100 mg L <sup>-1</sup> GO)  | 21.3 ± 0.9          | <i>P</i> < 0.01                      |
| Wild-type (control)                              | 15.3 ± 0.7          |                                      |
| Wild-type (100 mg L <sup>-1</sup> GO)            | 12.7 ± 0.3          |                                      |
| <i>akt-1(ok525)</i> (control)                    | 17.1 ± 0.4          | <i>P</i> < 0.01                      |
| <i>akt-1(ok525)</i> (100 mg L <sup>-1</sup> GO)  | 16.6 ± 0.3          | <i>P</i> < 0.01                      |
| Wild-type (control)                              | 15.2 ± 0.5          |                                      |
| Wild-type (100 mg L <sup>-1</sup> GO)            | 12.4 ± 0.6          |                                      |
| <i>akt-2(ok393)</i> (control)                    | 17.4 ± 0.6          | <i>P</i> < 0.01                      |
| <i>akt-2(ok393)</i> (100 mg L <sup>-1</sup> GO)  | 16.9 ± 0.4          | <i>P</i> < 0.01                      |
| Wild-type (control)                              | 15.1 ± 0.3          |                                      |
| Wild-type (100 mg L <sup>-1</sup> GO)            | 12.7 ± 0.7          |                                      |
| <i>daf-18(ok480)</i> (control)                   | 11.2 ± 0.6          | <i>P</i> < 0.01                      |
| <i>daf-18(ok480)</i> (100 mg L <sup>-1</sup> GO) | 8.5 ± 0.5           | <i>P</i> < 0.01                      |

**Table S3 | Genetic interactions of genes in the insulin signaling pathway in regulating GO toxicity on lifespan in nematode**

| Treatment                         | Mean lifespan (day) | Significance (compared with wild-type) |
|-----------------------------------|---------------------|----------------------------------------|
| Wild-type                         | 12.3 ± 0.5          |                                        |
| <i>daf-16(mu86)</i>               | 8.9 ± 0.7           | <i>P</i> < 0.01                        |
| <i>daf-2(e1370)</i>               | 22.4 ± 0.6          | <i>P</i> < 0.01                        |
| <i>age-1(hx546)</i>               | 21.7 ± 0.9          | <i>P</i> < 0.01                        |
| <i>daf-16(mu86);daf-2(e1370)</i>  | 9.3 ± 0.7           | <i>P</i> < 0.01                        |
| <i>daf-16(mu86);age-1(hx546)</i>  | 9.8 ± 0.9           | <i>P</i> < 0.01                        |
| Wild-type                         | 12.4 ± 0.6          |                                        |
| <i>daf-16(mu86)</i>               | 8.2 ± 0.8           | <i>P</i> < 0.01                        |
| <i>akt-1(ok525)</i>               | 15.9 ± 0.5          | <i>P</i> < 0.01                        |
| <i>akt-2(ok393)</i>               | 14.9 ± 0.4          | <i>P</i> < 0.01                        |
| <i>daf-16(mu86);akt-1(ok525)</i>  | 8.7 ± 0.6           | <i>P</i> < 0.01                        |
| <i>daf-16(mu86);akt-2(ok393)</i>  | 8.3 ± 0.7           | <i>P</i> < 0.01                        |
| Wild-type                         | 12.5 ± 0.8          |                                        |
| <i>daf-18(ok480)</i>              | 9.1 ± 0.5           | <i>P</i> < 0.01                        |
| <i>age-1(hx546)</i>               | 21.5 ± 0.8          | <i>P</i> < 0.01                        |
| <i>age-1(hx546);daf-18(ok480)</i> | 9.2 ± 0.7           | <i>P</i> < 0.01                        |

GO exposure concentration was 100 mg L<sup>-1</sup>.

**Table S4 | Tissue-specific activity of DAF-16 in regulating toxicity of GO on lifespan in nematodes**

| Treatment                                                         | Mean lifespan (day) | Significance (compared with wild-type) |
|-------------------------------------------------------------------|---------------------|----------------------------------------|
| Wild-type (100 mg L <sup>-1</sup> GO)                             | 11.8 ± 0.7          |                                        |
| <i>daf-16(mu86)</i> (100 mg L <sup>-1</sup> GO)                   | 6.7 ± 0.8           | <i>P</i> < 0.01                        |
| <i>daf-16(mu86)Ex(Pges-1-daf-16)</i> (100 mg L <sup>-1</sup> GO)  | 11.1 ± 0.9          | NS                                     |
| <i>daf-16(mu86)Ex(Punc-14-daf-16)</i> (100 mg L <sup>-1</sup> GO) | 6.9 ± 1.1           | <i>P</i> < 0.01                        |
| <i>daf-16(mu86)Ex(Pmyo-3-daf-16)</i> (100 mg L <sup>-1</sup> GO)  | 6.3 ± 0.5           | <i>P</i> < 0.01                        |
| <i>daf-16(mu86)Ex(Pmyo-2-daf-16)</i> (100 mg L <sup>-1</sup> GO)  | 6.2 ± 0.7           | <i>P</i> < 0.01                        |

NS, no significance.



**Table S5 | Effects of intestinal RNAi of genes encoding insulin signaling pathway on GO toxicity on lifespan in nematodes**

| Treatment                                                | Mean lifespan (day) | Significance (compared with VP303) |
|----------------------------------------------------------|---------------------|------------------------------------|
| VP303 (control)                                          | 12.9 ± 0.7          |                                    |
| VP303 (100 mg L <sup>-1</sup> GO)                        | 10.5 ± 0.4          |                                    |
| <i>daf-2</i> intestine RNAi (control)                    | 22.3 ± 0.8          | <i>P</i> < 0.01                    |
| <i>daf-2</i> intestine RNAi (100 mg L <sup>-1</sup> GO)  | 20.9 ± 1.2          | <i>P</i> < 0.01                    |
| <i>daf-16</i> intestine RNAi (control)                   | 10.3 ± 0.5          | <i>P</i> < 0.01                    |
| <i>daf-16</i> intestine RNAi (100 mg L <sup>-1</sup> GO) | 6.7 ± 0.6           | <i>P</i> < 0.01                    |
| VP303 (control)                                          | 13.1 ± 0.4          |                                    |
| VP303 (100 mg L <sup>-1</sup> GO)                        | 10.4 ± 0.5          |                                    |
| <i>age-1</i> intestine RNAi (control)                    | 22.3 ± 0.9          | <i>P</i> < 0.01                    |
| <i>age-1</i> intestine RNAi (100 mg L <sup>-1</sup> GO)  | 20.4 ± 0.6          | <i>P</i> < 0.01                    |
| <i>daf-18</i> intestine RNAi (control)                   | 10.1 ± 0.6          | <i>P</i> < 0.01                    |
| <i>daf-18</i> intestine RNAi (100 mg L <sup>-1</sup> GO) | 7.1 ± 0.6           | <i>P</i> < 0.01                    |
| VP303 (control)                                          | 12.7 ± 0.6          |                                    |
| VP303 (100 mg L <sup>-1</sup> GO)                        | 10.1 ± 0.5          |                                    |
| <i>akt-1</i> intestine RNAi (control)                    | 16.4 ± 1.1          | <i>P</i> < 0.01                    |
| <i>akt-1</i> intestine RNAi (100 mg L <sup>-1</sup> GO)  | 15.2 ± 0.9          | <i>P</i> < 0.01                    |
| <i>akt-2</i> intestine RNAi (control)                    | 16.9 ± 0.8          | <i>P</i> < 0.01                    |
| <i>akt-2</i> intestine RNAi (100 mg L <sup>-1</sup> GO)  | 16.1 ± 0.9          | <i>P</i> < 0.01                    |

GO)

---

**Table S6 | Effects of intestinal RNAi of *sod-3* gene on GO toxicity on lifespan in nematodes**

| Treatment                                               | Mean lifespan (day) | Significance (compared with VP303) |
|---------------------------------------------------------|---------------------|------------------------------------|
| VP303 (control)                                         | 13.6 ± 0.8          | NS                                 |
| VP303 (100 mg L <sup>-1</sup> GO)                       | 11.3 ± 0.5          |                                    |
| <i>sod-3</i> intestine RNAi (control)                   | 13.7 ± 0.7          |                                    |
| <i>sod-3</i> intestine RNAi (100 mg L <sup>-1</sup> GO) | 8.9 ± 0.7           |                                    |

NS, no significance.

**Table S7 | Genetic interaction between SOD-3 and DAF-16 in regulating GO toxicity on longevity in nematodes**

| Treatment                                                         | Mean lifespan (day) | Significance (compared with wild-type) |
|-------------------------------------------------------------------|---------------------|----------------------------------------|
| Wild-type (control)                                               | 15.5 ± 0.5          |                                        |
| Wild-type (100 mg L <sup>-1</sup> GO)                             | 12.3 ± 0.4          |                                        |
| <i>Ex(Pges-1-daf-16)</i> (control)                                | 22.7 ± 0.6          | <i>P</i> < 0.01                        |
| <i>Ex(Pges-1-daf-16)</i> (100 mg L <sup>-1</sup> GO)              | 21.9 ± 0.8          | <i>P</i> < 0.01                        |
| Wild-type                                                         | 14.9 ± 0.8          |                                        |
| <i>Ex(Pges-1-daf-16)</i>                                          | 27.6 ± 0.6          | <i>P</i> < 0.01                        |
| <i>sod-3(gk235)</i>                                               | 14.7 ± 0.9          | NS                                     |
| <i>Ex(Pges-1-daf-16);sod-3(gk235)</i>                             | 26.1 ± 0.5          | <i>P</i> < 0.01                        |
| Wild-type (100 mg L <sup>-1</sup> GO)                             | 12.6 ± 0.5          |                                        |
| <i>Ex(Pges-1-daf-16)</i> (100 mg L <sup>-1</sup> GO)              | 22.4 ± 0.9          | <i>P</i> < 0.01                        |
| <i>sod-3(gk235)</i> (100 mg L <sup>-1</sup> GO)                   | 8.6 ± 0.6           | <i>P</i> < 0.01                        |
| <i>Ex(Pges-1-daf-16);sod-3(gk235)</i> (100 mg L <sup>-1</sup> GO) | 9.5 ± 0.8           | <i>P</i> < 0.01                        |

NS, no significance.

**Table S8 | Information for RT-PCR primers**

| Gene          | Forward primer       | Reverse primer         |
|---------------|----------------------|------------------------|
| <i>tba-1</i>  | TCAACACTGCCATCGCCGCC | TCCAAGCGAGACCAGGCTTCAG |
| <i>daf-2</i>  | ATGTGGCGTGAGAATGAA   | AGCCGAACACGAACAACA     |
| <i>age-1</i>  | ATGGAAACCGCCGAGTGT   | ATTGGCAGTCGGTTCAGG     |
| <i>pdk-1</i>  | TTCAGAGCCGTCAACCAG   | GCTCACTTGCTCGGCTTT     |
| <i>sgk-1</i>  | AAGACTGTTGACTGGTGGTG | AGACGAAGTGGCTGGTTG     |
| <i>akt-1</i>  | GGACAACCGTTTCCTGAG   | GACGAACTTCTGCCGACT     |
| <i>akt-2</i>  | ATCAGCCGTTACCAGAGC   | AAGGTTTCCTTGACCGAGA    |
| <i>daf-18</i> | ATCATCATCCGCCGAGTC   | ACCGTTGAGTCCTCCATC     |
| <i>daf-16</i> | CGTTCCTTCGGATTCA     | ATTCCTTCCTGGCTTTGC     |
